# Supplementary material for: Beta-1,3 Oligoglucans Specifically Bind to Immune Receptor CD28 and May Enhance T Cell Activation
Source: PubMed Central journal article supplement (PMC8003162; doi:10.3390/ijms22063124), 2021-03-18
Supplement: ijms-22-03124-s001.pdf [file ijms-22-03124-s001.pdf]

*Supplementary Information for*  
**Beta-1,3 Oligoglucans Specifically Bind to Immune  
 Receptor CD28 and May Enhance T Cell  
 Activation**

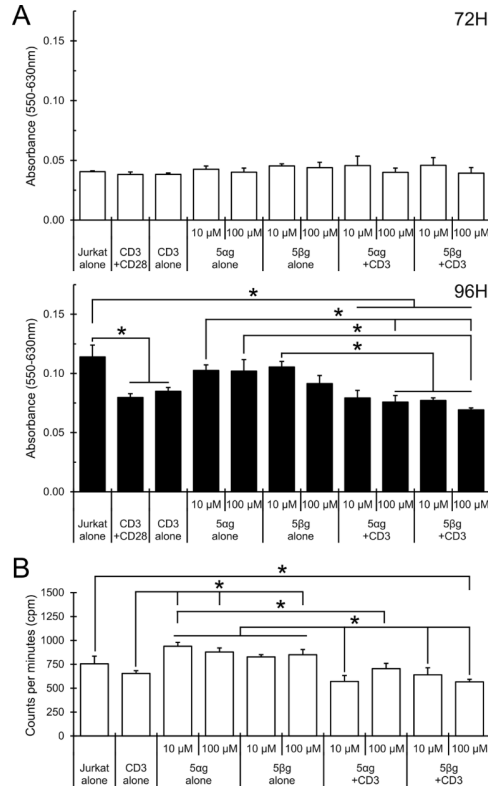

**Figure S1:** Neither 5-mer  $\alpha$ -1,4 nor 5-mer  $\beta$ -1,3 oligoglucans altered cell proliferation significantly as demonstrated by an MTT assay (**A**) and a  $^3\text{H}$ -thymidine incorporation assay (**B**). Jurkat cells were treated with either  $\alpha$ -1,4 or  $\beta$ -1,3 oligoglucans as indicated in the figure. The MTT assays were performed 72 hours (top) and 96 hours (bottom) after treatment. The  $^3\text{H}$ -thymidine incorporation was determined during the 20–24 hours after the treatment.
